# Supplementary material for: Correlation between Tissue Cellularity and Metabolism Represented by Diffusion-Weighted Imaging (DWI) and 18F-FDG PET/MRI in Head and Neck Cancer (HNC)
Source: MDPI journal article supplement (doi:10.3390/cancers14030847), 2022-02-08
Supplement: s1 [file s1]

Table S1. Summary of measurements.

| Parameters   | ADCmean<br>(10 <sup>-3</sup> mm <sup>2</sup> /s) | SUVmax     | TLG        | MTV        |
|--------------|--------------------------------------------------|------------|------------|------------|
| Sex          |                                                  |            |            |            |
| Male         | 0.906±0.44                                       | 11.06±0.55 | 125.9±1.56 | 13.87±1.61 |
| Female       | 0.910±0.85                                       | 9.48±0.39  | 128.6±2.05 | 17.76±2.59 |
| T stages     |                                                  |            |            |            |
| T1           | 0.934±0.18                                       | 6.24±0.32  | 17.66±0.66 | 2.68±0.18  |
| T2           | 0.893±0.30                                       | 10.30±0.45 | 74.58±1.02 | 6.90±0.53  |
| T3           | 0.900±0.23                                       | 11.96±0.62 | 142.1±1.13 | 16.01±1.36 |
| T4           | 0.924±0.49                                       | 9.96±0.39  | 173.4±2.42 | 22.70±0.29 |
| N stage      |                                                  |            |            |            |
| N0           | 0.960±0.12                                       | 7.60±0.52  | 130.7±2.83 | 19.8±0.35  |
| N1           | 0.905±0.10                                       | 9.38±0.38  | 45.36±0.31 | 10.6±0.88  |
| N2           | 0.909±0.11                                       | 11.54±0.57 | 163.9±2.53 | 16.6±0.19  |
| N3           | 0.889±0.16                                       | 10.95±0.14 | 226.7±3.31 | 24.6±0.33  |
| M stage      |                                                  |            |            |            |
| M0           | 0.913±0.13                                       | 10.36±0.50 | 119.9±1.52 | 14.64±0.18 |
| M1           | 0.866±0.91                                       | 12.26±0.61 | 180.3±2.91 | 18.45±2.87 |
| Localization |                                                  |            |            |            |
| Pharyngeal   | 0.822±0.24                                       | 10.81±0.53 | 156.4±1.82 | 17.19±1.81 |
| Laryngeal    | 0.946±0.28                                       | 11.78±0.56 | 88.35±0.78 | 9.14±0.93  |
| Oral         | 0.917±0.49                                       | 9.59±0.43  | 111.1±1.96 | 15.86±2.11 |
| Grade        |                                                  |            |            |            |
| G1           | 0.978±0.24                                       | 9.09±0.51  | 164.8±2.54 | 28.2±0.36  |
| G2           | 0.907±0.27                                       | 10.86±0.42 | 120.1±1.24 | 13.7±0.14  |
| G3           | 0.874±0.33                                       | 11.10±0.71 | 197.2±3.87 | 17.7±0.22  |
| Overall      | 0.907±0.81                                       | 10.57±0.53 | 126.9±1.17 | 15.07±0.22 |
